# Supplementary material
Source: PubMed Central journal article supplement (PMC3879048)
Supplement: NIHMS535797-supplement-Supplementary_Table_1.pdf [file NIHMS535797-supplement-Supplementary_Table_1.pdf]

**Supplemental Table S1. Regions exhibiting significantly greater activation in comparisons relative to individuals with ADHD and vice-versa in the meta-analyses restricted to specific tasks or clinical characteristics. Brodmann areas (BA) are indicated in parenthesis when identifiable. When located unambiguously in a cortical region, the anatomic label is followed in parenthesis, in italics, by the neural network corresponding to the maximum activation likelihood estimation value, from the seven reference neuronal networks identified by Yeo et al. (9).**

| Cluster #                                                                               | Volume (mm <sup>3</sup> ) | Weighted Center* |        |       | Extrema Value | Maximum ALE value* |     |    | Anatomical Label                                                                                              |
|-----------------------------------------------------------------------------------------|---------------------------|------------------|--------|-------|---------------|--------------------|-----|----|---------------------------------------------------------------------------------------------------------------|
|                                                                                         |                           | x                | y      | z     |               | x                  | y   | z  |                                                                                                               |
| <b>Comparisons &gt; Participants with ADHD</b>                                          |                           |                  |        |       |               |                    |     |    |                                                                                                               |
| <b>Stimulant naïve participants, all tasks</b>                                          |                           |                  |        |       |               |                    |     |    |                                                                                                               |
| <i>Number of foci= 149; Number of experiments= 20; Total number of subjects= 593 **</i> |                           |                  |        |       |               |                    |     |    |                                                                                                               |
| 1                                                                                       | 1648                      | 3.23             | 17.17  | 52.61 | 0.0143        | 0                  | 16  | 54 | Medial Superior Frontal Gyrus/Supplementary Motor Area (BA6) R, L ( <i>Frontoparietal/Ventral Attention</i> ) |
|                                                                                         |                           |                  |        |       | 0.0111        | 12                 | 22  | 56 | Superior Frontal Gyrus (BA 6) R                                                                               |
| 2                                                                                       | 664                       | 32.71            | 0.59   | 2.61  | 0.0132        | 32                 | 2   | 4  | Putamen R                                                                                                     |
| 3                                                                                       | 560                       | 8.9              | -15.81 | -2.77 | 0.0116        | 8                  | -16 | -2 | Thalamus R                                                                                                    |
| 4                                                                                       | 504                       | -29.04           | 58.98  | -0.49 | 0.0098        | -32                | 56  | -8 | Middle Frontal Gyrus (BA 10) L ( <i>Frontoparietal/Default</i> )                                              |
|                                                                                         |                           |                  |        |       | 0.0093        | -26                | 64  | 8  | Superior Frontal Gyrus (BA 10) L ( <i>Ventral Attention/Default</i> )                                         |
|                                                                                         |                           |                  |        |       | 0.0092        | -28                | 60  | 2  | Middle Frontal Gyrus (BA 10) L ( <i>Frontoparietal/Default</i> )                                              |
| 5                                                                                       | 400                       | 56.07            | 12.66  | -6.85 | 0.0131        | 56                 | 12  | -6 | Superior Temporal Gyrus (BA 22) R ( <i>Somatomotor</i> )                                                      |
| 6                                                                                       | 392                       | -18.38           | 7.79   | -7.36 | 0.0101        | -18                | 8   | -6 | Putamen L                                                                                                     |
| 7                                                                                       | 392                       | -17.98           | -2.78  | 61.2  | 0.0132        | -18                | -2  | 62 | Middle Frontal Gyrus (BA 6-8) L ( <i>Dorsal Attention</i> )                                                   |
| 8                                                                                       | 352                       | 43.38            | 9      | 30    | 0.0123        | 44                 | 8   | 30 | Inferior Frontal Sulcus; Inferior Precentral Sulcus R ( <i>Dorsal Attention/Frontoparietal</i> )              |

|    |     |       |        |       |        |    |     |    |                                                                                |
|----|-----|-------|--------|-------|--------|----|-----|----|--------------------------------------------------------------------------------|
| 9  | 272 | 13.94 | -45.7  | 26.65 | 0.0103 | 14 | -46 | 26 | Posterior Cingulate Cortex; Subparietal Sulcus R                               |
| 10 | 256 | 33.43 | -26.31 | 48.46 | 0.0101 | 34 | -26 | 48 | Postcentral Gyrus R ( <i>Somatomotor</i> )                                     |
| 11 | 232 | 2.3   | 47.39  | 15.64 | 0.0095 | 4  | 48  | 16 | Medial Frontal Gyrus; Paracingulate Sulcus (BA 10; BA 32) R ( <i>Default</i> ) |

**Participants without comorbidities, all tasks**

*Number of foci= 203; Number of experiments= 27; Total number of subjects= 791 \*\**

|    |      |        |        |       |        |     |     |    |                                                                                                                |
|----|------|--------|--------|-------|--------|-----|-----|----|----------------------------------------------------------------------------------------------------------------|
| 1  | 1896 | 1.28   | 16.35  | 52.44 | 0.0208 | 0   | 16  | 54 | Medial Superior Frontal Gyrus, BA 6; Supplementary Motor Area R, L ( <i>Frontoparietal/Ventral Attention</i> ) |
|    |      |        |        |       | 0.0111 | 12  | 22  | 56 | Superior Frontal Gyrus (BA 6) R                                                                                |
| 2  | 608  | 33.68  | -27.29 | 50.65 | 0.0137 | 34  | -28 | 52 | Postcentral Gyrus R ( <i>Somatomotor</i> )                                                                     |
| 3  | 496  | -28.03 | 59.69  | 0.87  | 0.0099 | -28 | 60  | 2  | Middle Frontal Gyrus (BA 10) L ( <i>Frontoparietal</i> )                                                       |
|    |      |        |        |       | 0.0098 | -32 | 56  | -8 | Middle Frontal Gyrus (BA 10) L ( <i>Default/Frontoparietal</i> )                                               |
| 4  | 472  | 30.15  | -0.44  | 4.78  | 0.0121 | 30  | 0   | 6  | Putamen R                                                                                                      |
| 5  | 384  | 19.42  | -91.75 | 8.07  | 0.0114 | 20  | -92 | 8  | Occipital Pole R                                                                                               |
| 6  | 344  | 55.94  | 12.9   | -5    | 0.0131 | 56  | 12  | -6 | Superior Temporal Gyrus (BA 22) R ( <i>Somatomotor</i> )                                                       |
| 7  | 336  | 40.62  | 10.85  | 6.6   | 0.0133 | 40  | 10  | 6  | Inferior Frontal Gyrus (Frontal Operculum) R ( <i>Ventral Attention</i> )                                      |
| 8  | 320  | -40.52 | 19.27  | -3.34 | 0.0104 | -40 | 18  | -2 | Inferior Frontal Gyrus (Orbital Part); Anterior Insula L ( <i>Frontoparietal</i> )                             |
| 9  | 304  | -18.94 | 7.69   | -7.77 | 0.0111 | -18 | 8   | -6 | Putamen L                                                                                                      |
| 10 | 272  | 43.53  | 9.00   | 30.00 | 0.0123 | 44  | 8   | 30 | Inferior Frontal Sulcus; Inferior Precentral Sulcus R ( <i>Dorsal Attention/Frontoparietal</i> )               |
| 11 | 232  | 3.91   | 48.57  | 15.79 | 0.0102 | 4   | 48  | 16 | Medial Frontal Gyrus; Paracingulate Sulcus (BA 10; BA 32) R ( <i>Default</i> )                                 |
| 12 | 200  | 46.96  | 25.92  | 33.13 | 0.0111 | 46  | 26  | 34 | Middle Frontal Gyrus (BA 9/46) R ( <i>Frontoparietal</i> )                                                     |

**All participants, inhibition tasks**

*Number of foci= 125; Number of experiments= 21; Total number of subjects= 566 \*\**

|   |      |        |        |       |        |     |     |    |                                                                                                               |
|---|------|--------|--------|-------|--------|-----|-----|----|---------------------------------------------------------------------------------------------------------------|
| 1 | 1264 | -0.23  | 15.53  | 53.54 | 0.0204 | 0   | 16  | 54 | Medial Superior Frontal Gyrus/Supplementary Motor Area (BA6) R, L ( <i>Frontoparietal/Ventral Attention</i> ) |
|   |      |        |        |       | 0.0091 | 0   | 14  | 44 | Paracingulate Gyrus (BA 32) R, L ( <i>Ventral Attention</i> )                                                 |
| 2 | 528  | 55.8   | 12.36  | -6.54 | 0.0136 | 56  | 12  | -6 | Superior Temporal Gyrus (BA 22) R ( <i>Somatomotor</i> )                                                      |
| 3 | 400  | 7.38   | -16.2  | -0.96 | 0.0112 | 8   | -16 | -2 | Thalamus R                                                                                                    |
| 4 | 296  | 42.71  | 14.54  | 9.2   | 0.0091 | 44  | 18  | 12 | Inferior Frontal Gyrus (Frontal Operculum) R                                                                  |
|   |      |        |        |       | 0.0091 | 42  | 12  | 8  | Inferior Frontal Gyrus (Frontal Operculum) R ( <i>Ventral Attention</i> )                                     |
| 5 | 280  | 51.27  | 25.43  | 21.95 | 0.0093 | 54  | 26  | 18 | Inferior Frontal Gyrus (BA 44/45) R ( <i>Frontoparietal</i> )                                                 |
|   |      |        |        |       | 0.0087 | 48  | 24  | 28 | Middle Frontal Gyrus (BA 9/46) R ( <i>Frontoparietal</i> )                                                    |
| 6 | 272  | -26.34 | 62.03  | 6     | 0.0096 | -26 | 64  | 8  | Superior Frontal Gyrus (BA 10) L ( <i>Frontoparietal/Default</i> )                                            |
| 7 | 224  | -37.94 | 44.77  | 3.96  | 0.0099 | -38 | 44  | 4  | Inferior Frontal Gyrus/Inferior Frontal Sulcus (BA 45; BA 9/46) L ( <i>Frontoparietal</i> )                   |
| 8 | 216  | -41.43 | -73.6  | -4.45 | 0.0102 | -42 | -74 | -4 | Inferior Occipital Gyrus L ( <i>Visual</i> )                                                                  |
| 9 | 216  | -7.55  | -29.84 | -4.89 | 0.0094 | -8  | -30 | -6 | Midbrain; Superior Colliculus L                                                                               |

**All participants, working memory tasks**

*Number of foci= 48; Number of experiments= 8; Total number of subjects= 341 \*\**

|   |     |        |       |      |        |     |    |    |                                                                                            |
|---|-----|--------|-------|------|--------|-----|----|----|--------------------------------------------------------------------------------------------|
| 1 | 264 | -40.13 | 20.73 | -6.2 | 0.0083 | -40 | 20 | -8 | Inferior Frontal Gyrus (Orbital Part); Anterior Insula L ( <i>Default/Frontoparietal</i> ) |
| 2 | 256 | 33     | 57    | 15   | 0.0087 | 32  | 56 | 14 | Middle Frontal Gyrus (BA 10) R ( <i>Frontoparietal</i> )                                   |

**All participants, attention tasks**

*Number of foci= 49; Number of experiments= 11; Total number of subjects=363 \*\**

|   |     |      |       |       |        |   |    |    |                                                            |
|---|-----|------|-------|-------|--------|---|----|----|------------------------------------------------------------|
| 1 | 560 | 1.51 | 14.47 | 43.93 | 0.0142 | 2 | 14 | 44 | Paracingulate Gyrus (BA 32) R ( <i>Ventral Attention</i> ) |
|---|-----|------|-------|-------|--------|---|----|----|------------------------------------------------------------|

**Participants with ADHD > Comparisons**

**Stimulant naïve participants, all tasks**

*Number of foci= 40; Number of experiments= 9; Total number of subjects= 239 \*\**

|   |     |       |       |       |        |    |    |    |                                |
|---|-----|-------|-------|-------|--------|----|----|----|--------------------------------|
| 1 | 448 | 31.24 | -7.25 | 16.55 | 0.0107 | 32 | -8 | 16 | White Matter R (sub-operculum) |
|---|-----|-------|-------|-------|--------|----|----|----|--------------------------------|

**Participants without comorbidities, all tasks**

*Number of foci= 70; Number of experiments= 14; Total number of subjects= 388 \*\**

|   |      |        |        |       |        |     |     |    |                                                                     |
|---|------|--------|--------|-------|--------|-----|-----|----|---------------------------------------------------------------------|
| 1 | 1152 | 40.34  | -59.6  | 16.15 | 0.0155 | 40  | -58 | 18 | Angular gyrus; Middle Occipital Gyrus R                             |
| 2 | 608  | -39.02 | -27.45 | 6.5   | 0.011  | -40 | -24 | 6  | Heschl's Gyrus L ( <i>Somatomotor</i> )                             |
|   |      |        |        |       | 0.0099 | -40 | -32 | 8  | Heschl's Gyrus L ( <i>Somatomotor</i> )                             |
| 3 | 488  | 11.72  | -50.3  | 30.56 | 0.0099 | 14  | -50 | 30 | Posterior Cingulate Cortex; Subparietal Sulcus R ( <i>Default</i> ) |
|   |      |        |        |       | 0.0093 | 4   | -48 | 30 | Posterior Cingulate Cortex R ( <i>Default</i> )                     |
| 4 | 280  | -48.2  | 33.83  | -0.2  | 0.0101 | -48 | 34  | 0  | Inferior Frontal Gyrus (BA 45) ( <i>Default</i> )                   |

**All participants, inhibition tasks**

*Number of foci= 41; Number of experiments= 10; Total number of subjects= 247 \*\**

|   |     |       |        |       |        |    |     |    |                                                    |
|---|-----|-------|--------|-------|--------|----|-----|----|----------------------------------------------------|
| 1 | 568 | 39.75 | -57.25 | 19.21 | 0.0133 | 40 | -58 | 20 | Angular Gyrus/Middle Occipital Gyrus R             |
| 2 | 256 | 22.53 | 38.93  | 20.5  | 0.0084 | 24 | 36  | 20 | Intermediate Frontal Sulcus/Frontal White Matter R |

Footnote: \*Montreal Neurological Institute coordinates; \*\* After removing complete overlap but including partial overlap of participants across studies from the same research groups; \*\*\* R: Right; L: Left. ALE: Activation likelihood estimation.
