# Supplementary material
Source: PubMed Central journal article supplement (PMC3879048)
Supplement: NIHMS535797-supplement-Supplementary_Table_2.pdf [file NIHMS535797-supplement-Supplementary_Table_2.pdf]

**Supplemental Table S2. Regions exhibiting significantly greater activation in comparisons relative to individuals with ADHD and vice-versa in the omnibus meta-analysis. Brodmann areas (BA) are indicated in parenthesis when identifiable. When located unambiguously in a cortical region, the anatomic label is followed in parenthesis, in italics, by the neural network corresponding to the maximum activation likelihood estimation value, from the seven reference neuronal networks identified by Yeo et al. (9).**

| Cluster #                                                                                | Volume (mm <sup>3</sup> ) | Weighted Center* |        |       | Extrema Value | Maximum ALE value* |     |    | Anatomical Label                                                                                                     |
|------------------------------------------------------------------------------------------|---------------------------|------------------|--------|-------|---------------|--------------------|-----|----|----------------------------------------------------------------------------------------------------------------------|
|                                                                                          |                           | x                | y      | z     |               | x                  | y   | z  |                                                                                                                      |
| <b>Comparisons &gt; Participants with ADHD, All (i.e., children + adults), all tasks</b> |                           |                  |        |       |               |                    |     |    |                                                                                                                      |
| <i>Number of foci= 322; Number of experiments= 47; Total number of subjects= 1453 **</i> |                           |                  |        |       |               |                    |     |    |                                                                                                                      |
| 1                                                                                        | 1544                      | -0.29            | 15.48  | 49.21 | 0.0213        | 0                  | 16  | 54 | Medial Superior Frontal Gyrus /Supplementary Motor Area (BA 6) R, L **** ( <i>Frontoparietal/Ventral Attention</i> ) |
|                                                                                          |                           |                  |        |       | 0.0186        | 0                  | 14  | 44 | Paracingulate Gyrus (BA 32) R, L ( <i>Ventral Attention</i> )                                                        |
| 2                                                                                        | 688                       | -19.66           | 6.16   | -1.65 | 0.0122        | -20                | 4   | 4  | Putamen L                                                                                                            |
| 3                                                                                        | 656                       | -51.78           | 13.11  | 4.05  | 0.0160        | -48                | 12  | 6  | Inferior Frontal Gyrus (Pars Opercularis; BA 44) L ( <i>Ventral Attention</i> )                                      |
|                                                                                          |                           |                  |        |       | 0.0136        | -58                | 14  | 2  | Inferior Frontal Gyrus (Pars Opercularis; BA 44) L                                                                   |
| 4                                                                                        | 632                       | 19.61            | -28.16 | 60.43 | 0.0147        | 20                 | -28 | 62 | Central Sulcus/Postcentral Gyrus R ( <i>Somatomotor</i> )                                                            |
|                                                                                          |                           |                  |        |       | 0.0113        | 22                 | -28 | 52 | Central Sulcus/Precentral Gyrus R                                                                                    |
| 5                                                                                        | 624                       | 55.99            | -25.46 | 27.94 | 0.0177        | 56                 | -26 | 28 | Inferior Parietal Lobule/ Supramarginal Gyrus (BA 40) R ( <i>Ventral Attention</i> )                                 |
| 6                                                                                        | 584                       | 30.96            | 0.63   | 3.33  | 0.0149        | 32                 | 0   | 4  | Putamen R                                                                                                            |
| 7                                                                                        | 392                       | 41.09            | 12.06  | 7.06  | 0.0143        | 40                 | 12  | 6  | Inferior Frontal Gyrus (Frontal Operculum) R ( <i>Ventral Attention</i> )                                            |
| 8                                                                                        | 376                       | -42.53           | 31.76  | 25.13 | 0.0147        | -42                | 32  | 24 | Middle Frontal Gyrus (BA 9/46) L ( <i>Frontoparietal</i> )                                                           |
| 9                                                                                        | 328                       | 33.5             | -27.31 | 50.85 | 0.0137        | 34                 | -28 | 52 | Postcentral Gyrus R ( <i>Somatomotor</i> )                                                                           |
| 10                                                                                       | 304                       | 42.91            | 32.5   | -3.12 | 0.0145        | 44                 | 32  | -4 | Inferior Frontal Gyrus (BA 47/12) R ( <i>Ventral Attention</i> )                                                     |
| 11                                                                                       | 224                       | 55.66            | 12.32  | -6.38 | 0.0136        | 56                 | 12  | -6 | Superior Temporal Gyrus (BA 22) R ( <i>Somatomotor</i> )                                                             |

|    |     |       |        |       |        |    |     |    |                                                                                   |
|----|-----|-------|--------|-------|--------|----|-----|----|-----------------------------------------------------------------------------------|
| 12 | 224 | 42.25 | 9.56   | 29.51 | 0.0134 | 42 | 10  | 30 | Inferior Frontal Sulcus/Inferior Precentral Sulcus R<br>( <i>Frontoparietal</i> ) |
| 13 | 200 | 26.63 | -42.02 | 63.69 | 0.0129 | 26 | -42 | 64 | Posterior Parietal Lobule (BA 7) R ( <i>Somatomotor</i> )                         |

**Participants with ADHD > Comparisons, All (i.e., children +adults), all tasks**  
*Number of foci= 121; Number of experiments= 23; Total number of subjects= 589 \*\**

|   |      |        |        |       |        |     |     |     |                                                                      |
|---|------|--------|--------|-------|--------|-----|-----|-----|----------------------------------------------------------------------|
| 1 | 1072 | 40.33  | -59.54 | 16.3  | 0.0155 | 40  | -58 | 18  | Angular Gyrus; Middle Occipital Gyrus R ***                          |
| 2 | 792  | -39.53 | -27.42 | 5.36  | 0.0116 | -40 | -24 | 6   | Heschl's Gyrus L ( <i>Somatomotor</i> )                              |
|   |      |        |        |       | 0.0103 | -40 | -32 | 6   | Heschl's Gyrus L ( <i>Somatomotor</i> )                              |
| 3 | 696  | 11.61  | -49.75 | 29.61 | 0.0106 | 14  | -50 | 30  | Posterior Cingulate Cortex; Subparietal Sulcus<br>( <i>Default</i> ) |
|   |      |        |        |       | 0.0098 | 4   | -48 | 30  | Posterior Cingulate Cortex R ( <i>Default</i> )                      |
| 4 | 656  | 3.57   | -14.81 | 41.47 | 0.0134 | 4   | -14 | 42  | Midcingulate Cortex R ( <i>Ventral Attention</i> )                   |
| 5 | 472  | 22.19  | 43.41  | 19.24 | 0.0111 | 22  | 44  | 20  | Intermediate Frontal Sulcus R                                        |
|   |      |        |        |       | 0.0087 | 24  | 36  | 20  | Intermediate Frontal Sulcus; Right Frontal White<br>Matter R         |
| 6 | 352  | -49.15 | 34.43  | -1.54 | 0.0102 | -48 | 34  | 0   | Inferior Frontal Gyrus (BA 45) L ( <i>Default</i> )                  |
|   |      |        |        |       | 0.0078 | -54 | 36  | -10 | Inferior Frontal Gyrus (BA 45; 47/12) L                              |
| 7 | 312  | 31.1   | -7.19  | 16.89 | 0.0107 | 32  | -8  | 16  | White Matter R (sub-operculum)                                       |

Footnote: \*Montreal Neurological Institute coordinates; \*\*After removing complete overlap but including partial overlap of participants across studies from the same research groups; \*\*\* R: Right; L: Left. ALE: Activation likelihood estimation.
