# Supplementary material
Source: PubMed Central journal article supplement (PMC3879048)
Supplement: NIHMS535797-supplement-Supplementary_Table_3.pdf [file NIHMS535797-supplement-Supplementary_Table_3.pdf]

**Supplemental Table S3. Subtraction analyses (p uncorrected 0.05) for the contrasts Comparisons > ADHD and ADHD > Comparisons. Brodmann areas (BA) are indicated in parenthesis when identifiable. When located unambiguously in a cortical region, the anatomic label is followed in parenthesis, in italics, by the neural network corresponding to the maximum activation likelihood estimation value, from the seven reference neuronal networks identified by Yeo et al. (9).**

| Cluster #                                       | Volume (mm <sup>3</sup> ) | Weighted Center* |      |      | Extrema Value | Maximum ALE value* |      |       | Anatomical Label                                                        |
|-------------------------------------------------|---------------------------|------------------|------|------|---------------|--------------------|------|-------|-------------------------------------------------------------------------|
|                                                 |                           | x                | y    | z    |               | x                  | y    | z     |                                                                         |
| <b>Comparisons&gt;ADHD, all tasks</b>           |                           |                  |      |      |               |                    |      |       |                                                                         |
| <b>Adults minus children</b>                    |                           |                  |      |      |               |                    |      |       |                                                                         |
| 1                                               | 304                       | -47.8            | 7.77 | 52.9 | 2.6520698     | -46                | 6.67 | 55.33 | Middle Frontal Gyrus (BA6) L ( <i>Default</i> )                         |
| <b>Children minus adults</b>                    |                           |                  |      |      |               |                    |      |       |                                                                         |
| 1                                               | 768                       | -0.24            | 15.7 | 42.9 | 1.8867052     | -6                 | 19.3 | 40.67 | Dorsal Anterior Cingulate Cortex (BA 32) L ( <i>Ventral Attention</i> ) |
|                                                 |                           |                  |      |      | 1.741477      | 0                  | 18   | 46    | Dorsal Anterior Cingulate Cortex (BA 32) R L ( <i>Frontoparietal</i> )  |
| 2                                               | 320                       | 41.6             | 10.3 | 29.2 | 2.0374997     | 42                 | 12   | 30    | Middle Frontal Gyrus R ( <i>Frontoparietal</i> )                        |
| 3                                               | 296                       | 47.41            | 25.8 | 31.4 | 2.5240846     | 48                 | 24   | 26    | Middle Frontal Gyrus R ( <i>Frontoparietal</i> )                        |
| 4                                               | 216                       | 55.38            | 13.9 | -7.4 | 2.0179162     | 58                 | 16   | -6    | Superior Temporal Gyrus (BA 22) R                                       |
| <b>Comorbid minus non-comorbid participants</b> |                           |                  |      |      |               |                    |      |       |                                                                         |
| 1                                               | 200                       | 24.14            | 26.7 | 31.2 | 2.180776      | 24                 | 26   | 32    | Middle Frontal Gyrus R                                                  |
| <b>Non-comorbid minus comorbid participants</b> |                           |                  |      |      |               |                    |      |       |                                                                         |
| 1                                               | 280                       | 3.87             | 48.4 | 16   | 2.3824043     | 1.5                | 46   | 15.75 | Perigenual Anterior Cingulate Cortex (BA 24) R                          |
| 2                                               | 232                       | 34.71            | -28  | 48.6 | 1.9565533     | 34.67              | -26  | 46    | Postcentral Gyrus R                                                     |
| <b>Stimulant-naïve minus stimulant-treated</b>  |                           |                  |      |      |               |                    |      |       |                                                                         |
| 1                                               | 440                       | 9.15             | -16  | -4.3 | 1.6706036     | 12                 | -14  | 0     | Thalamus R                                                              |
| 2                                               | 376                       | 10.63            | 21.3 | 56.3 | 1.8521799     | 9.67               | 23.3 | 58.33 | Superior Frontal Gyrus (BA 6) R                                         |
| 3                                               | 200                       | 13.76            | -45  | 26.1 | 2.3115952     | 14                 | -44  | 22    | White matter                                                            |
| <b>Stimulant-treated minus stimulant-naïve</b>  |                           |                  |      |      |               |                    |      |       |                                                                         |
| 1                                               | 288                       | 42.52            | 16.1 | 9.55 | 2.2029254     | 43                 | 22   | 12    | Sub-lobar insula R                                                      |

| <b>ADHD&gt;Comparisons, all tasks</b>          |     |       |      |      |           |       |      |       |                          |
|------------------------------------------------|-----|-------|------|------|-----------|-------|------|-------|--------------------------|
| <b>Comorbid minus non-comorbid</b>             |     |       |      |      |           |       |      |       |                          |
| 1                                              | 296 | 15.24 | -48  | 59.5 | 2.149434  | 15.17 | -48  | 59.5  | Superior parietal lobe R |
| <b>Stimulant-treated minus stimulant-naïve</b> |     |       |      |      |           |       |      |       |                          |
| 1                                              | 480 | 22.26 | 44.4 | 19.1 | 2.2262118 | 22.61 | 45.2 | 18.96 | Frontal pole R           |
| 2                                              | 200 | 13.99 | -49  | 26.1 | 1.8926833 | 13.6  | -49  | 25.4  | White matter             |

Footnote: \**Montreal Neurological Institute coordinates*; \*\**After removing complete overlap but including partial overlap of participants across studies from the same research groups*; \*\*\* *R: Right; L: Left*.
